# A Study of Brain Networks Associated with Swallowing Using Graph-Theoretical Approaches

Bo Luan<sup>1</sup>, Peter Sörös<sup>2</sup>, Ervin Sejdić<sup>1\*</sup>

**1** Department of Electrical and Computer Engineering, Swanson School of Engineering, University of Pittsburgh, Pittsburgh, Pennsylvania, United States of America, **2** Department of Clinical Neurological Sciences and the School of Communication Sciences, Western University, London, Ontario, Canada

## Abstract

Functional connectivity between brain regions during swallowing tasks is still not well understood. Understanding these complex interactions is of great interest from both a scientific and a clinical perspective. In this study, functional magnetic resonance imaging (fMRI) was utilized to study brain functional networks during voluntary saliva swallowing in twenty-two adult healthy subjects (all females,  $23.1 \pm 1.52$  years of age). To construct these functional connections, we computed mean partial correlation matrices over ninety brain regions for each participant. Two regions were determined to be functionally connected if their correlation was above a certain threshold. These correlation matrices were then analyzed using graph-theoretical approaches. In particular, we considered several network measures for the whole brain and for swallowing-related brain regions. The results have shown that significant pairwise functional connections were, mostly, either local and intra-hemispheric or symmetrically inter-hemispheric. Furthermore, we showed that all human brain functional network, although varying in some degree, had typical small-world properties as compared to regular networks and random networks. These properties allow information transfer within the network at a relatively high efficiency. Swallowing-related brain regions also had higher values for some of the network measures in comparison to when these measures were calculated for the whole brain. The current results warrant further investigation of graph-theoretical approaches as a potential tool for understanding the neural basis of dysphagia.

**Citation:** Luan B, Sörös P, Sejdić E (2013) A Study of Brain Networks Associated with Swallowing Using Graph-Theoretical Approaches. PLoS ONE 8(8): e73577. doi:10.1371/journal.pone.0073577

**Editor:** Yong He, Beijing Normal University, Beijing, China

**Received:** April 16, 2013; **Accepted:** July 26, 2013; **Published:** August 29, 2013

**Copyright:** © 2013 Luan et al. This is an open-access article distributed under the terms of the Creative Commons Attribution License, which permits unrestricted use, distribution, and reproduction in any medium, provided the original author and source are credited.

**Funding:** The authors have no support or funding to report.

**Competing Interests:** The authors have declared that no competing interests exist.

\* E-mail: esejdic@ieee.org

## Introduction

Dysphagia (swallowing difficulties) may arise from the entry of foreign matter into respiratory pathways [1]. It is a serious condition that often accompanies acute stroke, acquired brain damage, and neuro-degenerative illnesses [2]. Patients with swallowing difficulties are vulnerable to the entry of foreign matter into the respiratory tract. This foreign matter will greatly increase the occurrence of severe respiratory problems among dysphagia patients. Therefore, understanding the neural basis of dysphagia is one of the paramount steps needed to develop future rehabilitation procedures.

The human brain is considered to be a large-scale robust and interactive biological system with non-trivial topological properties [3], such as hierarchy and small-world properties [4]. The human brain is considered to be one of the most complex networks found in nature. This biological system responds to external stimuli by transporting signals between specialized brain regions. Therefore, the study of brain functional connectivity contributes greatly to the understanding of brain functions and pathology.

Previous studies on graph theory suggested the possibility of performing network analysis on the human brain [4]. Using network analysis, the large variability of the brain structure could be abstractly reduced to a collection of nodes and links (edges). For functional networks, brain regions are represented by nodes and connections between regions are represented by links. By utilizing

graph-theoretical approaches, the differences and similarities in the structure of brain functional networks can be easily identified. Also, the brain network shows consistent topology so that properties, such as small-worldness, could generally be identified in all human brain networks [5]. Furthermore, given that network nodes stand for brain regions and links stand for connections between them, comparison between different kinds of networks become fairly feasible [5].

Recent neuroimaging studies have consistently demonstrated evidence that swallowing is associated with activation in multiple regions of the human brain [6], [7], [8], [9], [10], [11], [12], [13], [14]. Previous analyses of brain functions during swallowing revealed activation clusters in the supplementary motor area, anterior cingulate and paracingulate gyri, pre- and postcentral gyrus [15]. Several other regions have also been found related to swallowing, including the posterior insula [16], basal ganglia, thalamus, and cerebellum. Despite these findings, interactions between different swallowing-related brain regions are still not well understood. Therefore, the study of brain functional connectivity during swallowing will contribute greatly to the understanding of brain integration and segregation. To accomplish this task, previous studies suggested graph theory as a valuable tool for performing network analysis on human brain neuroimaging studies [4], [5]. The graph-theoretical approaches enable us to accomplish a comparison between different kinds of networks [5].

The goal of this study is to use graph-theoretic approaches to examine the interaction between brain regions during voluntary saliva swallowing in healthy young adults and compare network properties between and within subjects. To be specific, we aim to determine inter- and intra- hemispherical connections during swallowing tasks. Furthermore, differences between the whole-brain network and various regions of interest (ROIs) on computed network measures will be studied.

## Materials and Methods

### Data Acquisition

Twenty-two healthy young-adult subjects, all females ( $23.1 \pm 1.52$  years), participated in this study after providing written, informed consent. The study protocol was approved by the University of South Carolina Institutional Review Board.

All functional magnetic resonance scans of the brain were acquired on a Siemens Magnetom Tesla Trio Tim scanner with a 32-channel RF-receive head coil at the McCausland Center for Brain Imaging, University of South Carolina, Columbia, SC, USA. These blood oxygen level dependent (BOLD) images were acquired using an echo planar imaging sequence in 36 axial slices (TR = 2200 ms, TE = 35 ms, flip angle =  $90^\circ$ , FOV = 192 mm, 3 mm thickness) during swallowing. During our experiment, participants were instructed to swallow their accumulated saliva every 44 seconds (every 20 volumes acquired). They were directed to move as little as possible. They were also instructed not to produce exaggerated oral movements to increase or manipulate the accumulation of saliva. The saliva should be accumulated passively prior to swallowing. A comfortable custom-built restraint was applied during fMRI scans to minimize head movement. A high-resolution T1-weighted MRI sequence was also performed during the data collection (3D MP-RAGE, 176 axial slices with 1 mm slice thickness, a  $256 \times 256$  matrix, and 256 mm  $\times$  256 mm FOV).

### Data Preprocessing Steps

**fMRI Data Preprocessing.** All data in the study were preprocessed using Statistical Parametric Mapping (SPM) software [17]. For each subject 350 volumes of the scans were acquired, and the first 10 scans were discarded for magnetic equilibrium. The remaining each of the 340 volumes underwent the following four preprocessing steps sequentially: realignment, coregistration, normalization, and smoothing. Excess motion defined as greater than 4.0 mm of translation/rotation was eliminated in any of the task-free scans.

Specifically, the fMRI scans for each subject were first adjusted for time delay between different scans. Second, for each subject the images were realigned to the first slices among all slices using a least squares fitting algorithm and a 6 parameter rigid body transformation [18] to correct for head motion. The following formula for head movement calculates the group difference in translation and rotation [19]:

$$\text{Headmotion/Rotation} = \frac{1}{M-1} \sum_{i=2}^M \sqrt{|x_i - x_{i-1}|^2 + |y_i - y_{i-1}|^2 + |z_i - z_{i-1}|^2} \quad (1)$$

where  $M = 340$  represents the length of the time series. The  $x_i$ ,  $y_i$  and  $z_i$  are the translations or rotations magnitude in the  $x$ ,  $y$  and  $z$  directions at  $i$ -th time point, respectively.

After removing the movement interference in fMRI images, the fMRI images further underwent the coregistration step during which the mean fMRI scans were overlaid on a high resolution anatomical image to maximize the mutual information. Therefore, all other functional images were resliced to align with the reference image.

Then, to make inter-individual comparisons, normalization was then performed to warp the images to fit a standard MNI (Montreal Neurological Institute) template. Finally, smoothing was applied with Gaussian kernel with a 4-mm full-width at half maximum to suppress noise and effects due to residual differences [17].

**Anatomic Parcellation.** The choice of nodes and links greatly influences the results of network connectivity analysis [20]. We chose the parcellation (segmentation) scheme that has been used previously in many network studies (e.g., [21], [19], [22], [23]). Therefore, the preprocessed fMRI datasets were parcellated into 116 anatomical ROIs via the automated anatomical labeling (AAL) template [24]. The AAL parcellation scheme segments the cerebrum into 90 cortical and subcortical anatomical ROIs (45 ROIs in each hemisphere) [24]. It divides the cerebellum into 26 ROIs (8 in the vermis and 18 in the cerebellar hemisphere, 9 in each side of the cerebellar hemisphere). This study considered the 90 cerebrum regions summarized in Table 1. This parcellation scheme provides non-overlapping segmentation of the entire brain volume such that each brain area depicted in AAL only points to one brain region in Table 1. These individual anatomical ROIs were parcellated from the whole brain by the MarsBaR toolbox [25]. Therefore, for each subject, we generated 90 time series for all the 90 anatomical ROIs in Table 1. The mean time series is the average of voxels for every time point in the time series over all 22 subjects in the study. This procedure generated the mean time series with 340 time points. These 90 mean time series were then correlated with each other to establish a  $90 \times 90$  brain functional connectivity matrix.

### Graph Theory Analysis

Graphs are sets of nodes and links. Nodes are the most basic element in functional network analysis. Links can be used as undirected paths, meaning that it can go both directions. Links can also be directed, meaning a node can traverse the network either forward or backward but never reverse direction [5]. For brain functional networks, nodes may represent neurons, cortical areas or brain regions whereas links may represent correlations. Therefore, links could depict activity patterns between nodes and form functional connectivity among nodes [5].

**Network Measures.** Using a graph-theoretical definition, a network is a collection of sets of nodes and links, where a node is considered as the most essential element of the network [20]. A graph theory based approach can quantitatively and analytically depict a wide variety of measures for brain networks. However, various measurements can describe a network in an effective way. Therefore, only some of the measurements that were used in previous connectivity studies are discussed here.

For binary undirected networks, we use  $a_{ij}$  to represent the connection status in the network between node  $i$  and  $j$ .  $a_{ij} = 0$  when no connection exists between two nodes and  $a_{ij} = 1$  when the connection is present between two nodes. For weighted undirected networks,  $w_{ij}$  is the connection between nodes  $i$  and  $j$ , and it has range  $0 < w_{ij} < 1$ . Because of the limitation of current fMRI neuroimaging techniques, the weighted directed network cannot be constructed in this study.

The node degree describes the number of direct connections a node has with the rest of the nodes in the network. The node degree is considered to be the most fundamental network measure.

**Table 1.** Cortical and sub-cortical regions (45 in each cerebral hemisphere; 90 in total) as anatomically defined in the AAL template and their corresponding abbreviations used in this study.

| Region                                                | Abbreviation | Region                                    | Abbreviation |
|-------------------------------------------------------|--------------|-------------------------------------------|--------------|
| Precentral gyrus                                      | PreCG        | Supramarginal gyrus                       | SMG          |
| Postcentral gyrus                                     | PosCG        | Precuneus                                 | PCUN         |
| Rolandic operculum                                    | ROL          | Superior occipital gyrus                  | SOG          |
| Superior frontal gyrus, dorsolateral                  | SFGdor       | Middle occipital gyrus                    | MOG          |
| Middle frontal gyrus                                  | MFG          | Inferior occipital gyrus                  | IOG          |
| Inferior frontal gyrus, opercular part                | IFGoper      | Cuneus                                    | CUN          |
| Inferior frontal gyrus, triangular part               | IFGtri       | Calcarine fissure and surrounding cortex  | CAL          |
| Superior frontal gyrus, medial                        | SFGmed       | Lingual gyrus                             | LING         |
| Supplementary motor area                              | SMA          | Fusiform gyrus                            | FFG          |
| Paracentral lobule                                    | PCL          | Temporal pole: superior temporal gyrus    | TPOstg       |
| Superior frontal gyrus, orbital part                  | SFGorb       | Temporal pole: middle temporal gyrus      | TPO          |
| Superior frontal gyrus, medial orbital                | SFGmedorb    | Anterior cingulate and paracingulate gyri | ACP          |
| Middle frontal gyrus, orbital part                    | MFGorb       | Median cingulate and paracingulate gyri   | MCP          |
| Inferior frontal gyrus, orbital part                  | IFGorb       | Posterior cingulate gyrus                 | PCG          |
| Gyrus rectus                                          | GRE          | Hippocampus                               | HIP          |
| Olfactory cortex                                      | OLF          | Parahippocampal gyrus                     | PHG          |
| Superior temporal gyrus                               | STG          | Insula                                    | INS          |
| Heschl gyrus                                          | HES          | Amygdala                                  | AMY          |
| Middle temporal gyrus                                 | MTG          | Caudate nucleus                           | CAU          |
| Inferior temporal gyrus                               | ITG          | Lenticular nucleus, putamen               | PUT          |
| Superior parietal gyrus                               | SPG          | Lenticular nucleus, pallidum              | PAL          |
| Inferior parietal, but supramarginal and angular gyri | IPL          | Thalamus                                  | THA          |
| Angular gyrus                                         | ANG          |                                           |              |

doi:10.1371/journal.pone.0073577.t001

It is also a foundation for most of the network measures in this study. The summation of all the node degrees in a set in the network derives a degree distribution [26]. In a random network, connections are distributed randomly and uniformly with a symmetrical Gaussian shape and centered degree distribution [27]. A brain functional network, however, has a non-Gaussian distribution with a tendency to spread towards higher degrees [26]. Thus, we later introduce the rank-sum test to discuss the difference between two different groups.

The degree  $D_i$  of a node  $i$  is the number of nodes directly connected to the  $i$ th node. For a binary network, the node degree is defined as  $k_i = \sum_{j \in N} a_{ij}$  and for a weighted network it is defined as  $k_i = \sum_{j \in N} w_{ij}$ , where  $N$  is the set of all nodes in a collection, and  $n$  is the number of nodes in the collection. Given that the whole brain was parcellated into 90 ROIs, therefore,  $n$  is equal to 90, and  $N$  is the set of different possibilities (e.g.,  $N \in \{1, 2, 3, \dots, 90\}$ ). The degree of the entire network, therefore, is calculated by averaging all the nodes in the network:

$$D = \frac{1}{n} \sum_{i \in N} D_i. \quad (2)$$

The clustering coefficient  $C_i$  of a node  $i$  calculates the ratio between the number of existing connections and the maximum number of connections in a set of nodes [28]. The existing connections here are defined as the links between the direct neighbors of the node  $i$ . Connections in random networks are uniformly and randomly distributed so that clustering coefficients are relatively low for a random network, whereas complex networks contain densely connected clusters leading to a higher clustering coefficient [27]. For a binary network, the clustering coefficient  $C_i^B$  of the node  $i$  is calculated as [29]:

$$C_i^B = \frac{E_i}{D_i(D_i - 1)/2} \quad (3)$$

in which  $E_i$  is the number of links in  $i$ th set of nodes  $N_i$  ( $N_i \subset N$ ), and  $D_i$  is the degree of node  $i$  mentioned above. The clustering coefficient  $C_i^W$  of a node  $i$  in a weighted network is calculated as [29]:

$$C_i^W = \frac{1}{S_i(D_i - 1)} \sum_{j,h} \frac{w_{ij} + w_{ih}}{2} a_{ij} a_{ih} a_{jh} \quad (4)$$

where the normalizing factor  $S_i(D_i - 1)$  assures that  $0 \leq C_i^W \leq 1$ ;  $S_i = \sum_{j=1}^N a_{ij} w_{ij}$ ;  $D_i$  is the degree of a node  $i$ .  $a_{ij}$  is the connection

status between node  $i$  and node  $j$ . The value of  $a_{ij}$  is 1 if there is a link connecting node  $i$  and node  $j$ , and it is equal to 0 if no connection is presented. This applies to  $a_{ih}$  and  $a_{jh}$  as well. Therefore, the clustering coefficient of a  $n$ -nodes network is calculated as [20]:

$$C = \frac{1}{n} \sum_{i \in N} C_i \quad (5)$$

where  $C_i = C_i^B$  for binary networks and  $C_i = C_i^W$  for weighted networks.

The shortest path length  $L_i$  is given by the shortest distance from the node  $i$  to another node. The shortest path between two nodes could consist of multiple in-between connections when there is no direct connection between them. In comparison to regular networks, complex and random networks generally have short path lengths [26]. The definition of complex, random and regular networks can be found in [4]. The mean path length for a node  $i$  is defined as [20]:

$$L_i = \frac{1}{n-1} \sum_{j \in N, i \neq j} d_{ij} \quad (6)$$

where  $d_{ij}$  is the shortest distance between node  $i$  and node  $j$ . In a binary network, the value of every existing link is 1.  $d_{ij}$  is thus the number of links connecting node  $i$  and node  $j$ . However, for a weighted network, the shortest path length is not necessarily the optimal value, as the weighted network also contains information about connection strength (thickness of link) between nodes [20]. To differentiate the strength of these connections in a weighted network, the strength of every link between node  $i$  and node  $j$  is associated with weight indices  $w_{ij}$ . This weight index value was normalized to a range from 0 to 1 [29]. To calculate the weight indices in a weighted network, we followed the approach given by Boccaletti et al. [30]. Let the length between nodes  $i$  and  $j$  be inversely proportional to the weight indices  $w_{ij}$ :

$$l_{ij} = \frac{1}{w_{ij}} \quad (7)$$

For the weighted network,  $d_{ij} = l_{ij}$ . Then the mean shortest absolute path length of the network is the average of shortest absolute path length of all nodes [20]:

$$L = \frac{1}{n} \sum_{i \in N} L_i \quad (8)$$

The global efficiency of a network,  $E_{glob}$ , measures the average inverse shortest path length [31]. It is inversely related to the characteristic path length, and it is an alternative way to indicate the parallel information transfer efficiency in the network [4], [32]. It can also be used to describe the connectivity of the network [32], [33]. In comparison to the characteristic path length, the global efficiency makes quantifying disconnected networks possible [20]. Mathematically, for both binary and weighted functional networks, the global efficiency for a node  $i$  is calculated as [29]:

$$E_{glob,i} = \frac{1}{n-1} \sum_{j \in N, i \neq j} d_{ij}^{-1}. \quad (9)$$

In comparison to the mean path length (eqn. 6), the global efficiency of a node  $i$  calculates the inverse of the harmonic mean of the minimum absolute path length between node  $i$  and others [32]. The global efficiency of the network is the average of global efficiency for all nodes and is calculated as:

$$E_{glob} = \frac{1}{n} \sum_{i \in N} E_{glob,i} \quad (10)$$

For binary networks, the local efficiency of the  $i$ th node is calculated as:

$$E_{loc,i}^B = \frac{1}{D_i(D_i-1)} \sum_{j,h \in N, i \neq j} a_{ij} a_{ih} [d_{jh}(N_i)]^{-1} \quad (11)$$

where  $d_{jh}(N_i)$  is the shortest path length between  $j$  and  $h$  that contains only neighbors of  $i$ . For weighted networks, the local efficiency of the node  $i$  is defined as:

$$E_{loc,i}^W = \frac{1}{D_i(D_i-1)} \sum_{j,h \in N, i \neq j} (w_{ij} w_{ih} [d_{jh}^w(N_i)]^{-1})^{1/3} \quad (12)$$

**Analysis of Whole-Brain Network Small-World Attributes.** Small-world measurements (e.g., [4]) involve a mean cluster coefficient  $C$  and a mean characteristic path length  $L$ . To be specific, the parameter  $C$  is the average of the clustering coefficient over all nodes in the functional network. It quantifies the level of cliquishness (local interconnectivity) of a typical neighborhood [4]. The parameter  $L$  of a network is reflected by the harmonic mean distance between pairs proposed by [34], which is defined as the reciprocal of the average of the reciprocals:

$$L^{-1} = \frac{1}{\frac{1}{2}n(n+1)} \sum_{i \geq j} d_{ij}^{-1} \quad (13)$$

A high clustering coefficient and a short characteristic path length suggests the network is described by optimal small-world attributes [4], [33], [35]. In other words, a network has less than optimal organization if the absolute path length is relatively short and the absolute clustering coefficient is relatively low [19]. Mathematically, a network would be classified as a small-world network if it satisfies the following two conditions [3]:

$$\gamma = \frac{C}{C_{rand}} \gg 1 \quad (14)$$

and

$$\lambda = \frac{L}{L_{rand}} \approx 1 \quad (15)$$

in which  $C_{rand}$  indicates the mean clustering coefficient of a random network and  $L_{rand}$  indicates the mean characteristic path

length of a random network. The random network preserves the same amount of nodes, links and degree distribution as the functional network. The  $C_{rand}$  and  $L_{rand}$  values are calculated by generating many random networks for each individual's functional network. Note that the small-worldness parameter might vary with the change of the sparsity threshold value. When a more rigorous sparsity threshold is chosen, fewer connections will likely exist, leading to a sparser network [36]. Mathematically, the small-worldness is calculated as:

$$S = \frac{C/C_{rand}}{L/L_{rand}} \quad (16)$$

**Analysis of Whole-Brain Network Hierarchy.** In addition to small-world attributes, the hierarchy was used to characterize topological properties of the human brain [37], as it offered an alternative view on the topological properties of complex networks [38]. The hierarchy of the networks was interpreted by the coefficient  $\beta$ , which described the relationship between clustering coefficient  $C$  and node degree  $k$  of the network [38] using a power law approach:  $C \sim k^{-\beta}$ . Networks with a high hierarchy value are characterized by a higher degree  $k$  and low clustering coefficient  $C$ , and vice versa. The networks with hierarchical structures contain interconnected clusters, which are the combination of smaller and more densely connected clusters [38].

### Construction of Functional Connectivity Networks

Functional connectivity networks share various significant common ground with anatomical and structural connectivity networks [39], but they also have obvious differences. For example, in structural connectivity networks, connection weights indicate the amount of fibers between regions, the degree of myelination, the probability of connection between two nodes, or the amount of dye that traverse between two nodes, while in functional connectivity studies weights indicate the correlation in the time course of signals of different nodes [5].

Partial correlation could measure the inter-regional functional connectivity by attenuating the contribution of other sources of covariance [40]. A partial correlation matrix is a symmetrical matrix derived from the fMRI time series of each participant. In the correlation matrix, each off-diagonal entry is the correlation between a pair of variables (brain regions) while attenuating their correlation with other variables [19]. In this case, given 90 regions defined in the study in Table 1, a symmetric partial correlation matrix of  $90 \times 90$  was obtained for each subject. Correlation between any two regions of interest reduced the indirect dependencies of the other 88 regions. When the time series of two brain regions are highly correlated, it implies that the two regions are active at the same time. Using this approach, the mean correlation matrix for all subjects was computed. A sample processing procedure is shown in Figure 1.

The individual partial correlation matrices were thresholded to ensure that each node in the network is not too densely clustered, nor too sparsely connected. In other words, thresholding was used in the study to eliminate the links that were likely to attenuate the effect of important connections [20]. The selection of threshold values significantly affected the topological properties of the thresholded networks, as a different number of links in functional networks may represent a different magnitude of correlational interactions. Therefore, to ensure that the partial correlation matrix for each subject had the same number of links, we followed the method proposed by Supekar et al. [33]. Individual partial correlation matrices were thresholded such that each network after

thresholding had on average  $K$  links per node. This approach ensured that both groups had the same number of links per node so that the topological properties of the networks were consistent. Moreover, we selected a conservative  $K$  to prevent the generated network from disconnecting or containing non-significant connections. As shown in Figure 2, selecting 60 edges per node produced excessive connections, while selecting 36 edges per node lost important connectivity information. Therefore, as suggested in [33], [41], we selected a  $K$  value equal to 48. All networks constructed according to this approach had 2160 edges ( $= 48 \times 90/2$ ).

To understand the small-world properties of the obtained networks, the value of  $C$  and  $L$  from the functional network were compared with those of 1000 random networks generated by a Markov-chain algorithm [38]. In the random matrix generated by Markov-chain algorithm, if node  $i_1$  was linked to  $j_1$  and node  $i_2$  was linked to  $j_2$ , then the link between node  $i_1$  and  $j_1$  was removed while a link between node  $i_2$  and  $j_2$  was added [42]. Then the matrix was randomly permuted such that the random matrix and original matrix had equivalent node degree. We repeated this procedure over 1,000 random matrix generated by Markov-chain algorithm to obtain mean  $C_{rand}$  and mean  $L_{rand}$  values for every degree and threshold value. In order to study the influence of thresholding, we calculated several network properties as a function of the sparsity thresholds. In order to calculate  $C_{rand}$  and  $L_{rand}$ , we followed the methodology outlined in [19].

In our study, we examined hierarchy values derived from both whole-brain functional networks and also swallowing related regions. These two connectivity matrices were constructed by thresholding the correlation matrix such that each node in the resulting network generally had 48 connections. The threshold values ranged from 0 to 1, with an increment of 0.05. In order to calculate hierarchy, the clustering coefficient  $C$  and node degree  $k$  had to be computed for every node in the network. In order to model the relationship between  $C$  and  $k$ , we fitted a fifth order linear regression curve to express the relationship between  $\log(C)$  and  $\log(k)$ .

**Comparison Between the Whole Brain and Swallowing-Related Regions.** In our analysis, we compared the network measures calculated for the whole brain and for the previously identified regions activated during swallowing (e.g., [7], [12], [13], [15]), which are listed in Table 2. We examined whether these network measures were affected by the selected regions.

**Network Toolboxes.** In this study, we used an open source Brain Connectivity Toolbox (BCT) [20] for calculation of various network properties. The toolbox provided functions for a number of network measures. In addition, the toolbox enabled the network manipulation such as thresholding.

**Statistical Tests.** To distinguish the difference between swallowing related regions to whole brain metrics we used the non-parametric Mann-Whitney Wilcoxon rank-sum test [43].

## Results

Binary and weighted functional networks were created for all subjects using the outlined approach. These functional networks were sensitive to threshold values as shown in Figure 2, which depicted the effects of thresholding the partial correlation matrices such that each node in the resultant network had on average  $K$  connections. A summary of our results can be found below.

### Network Features

Figure 3 demonstrated significant differences between the whole-brain matrices and swallowing ROIs for some of the

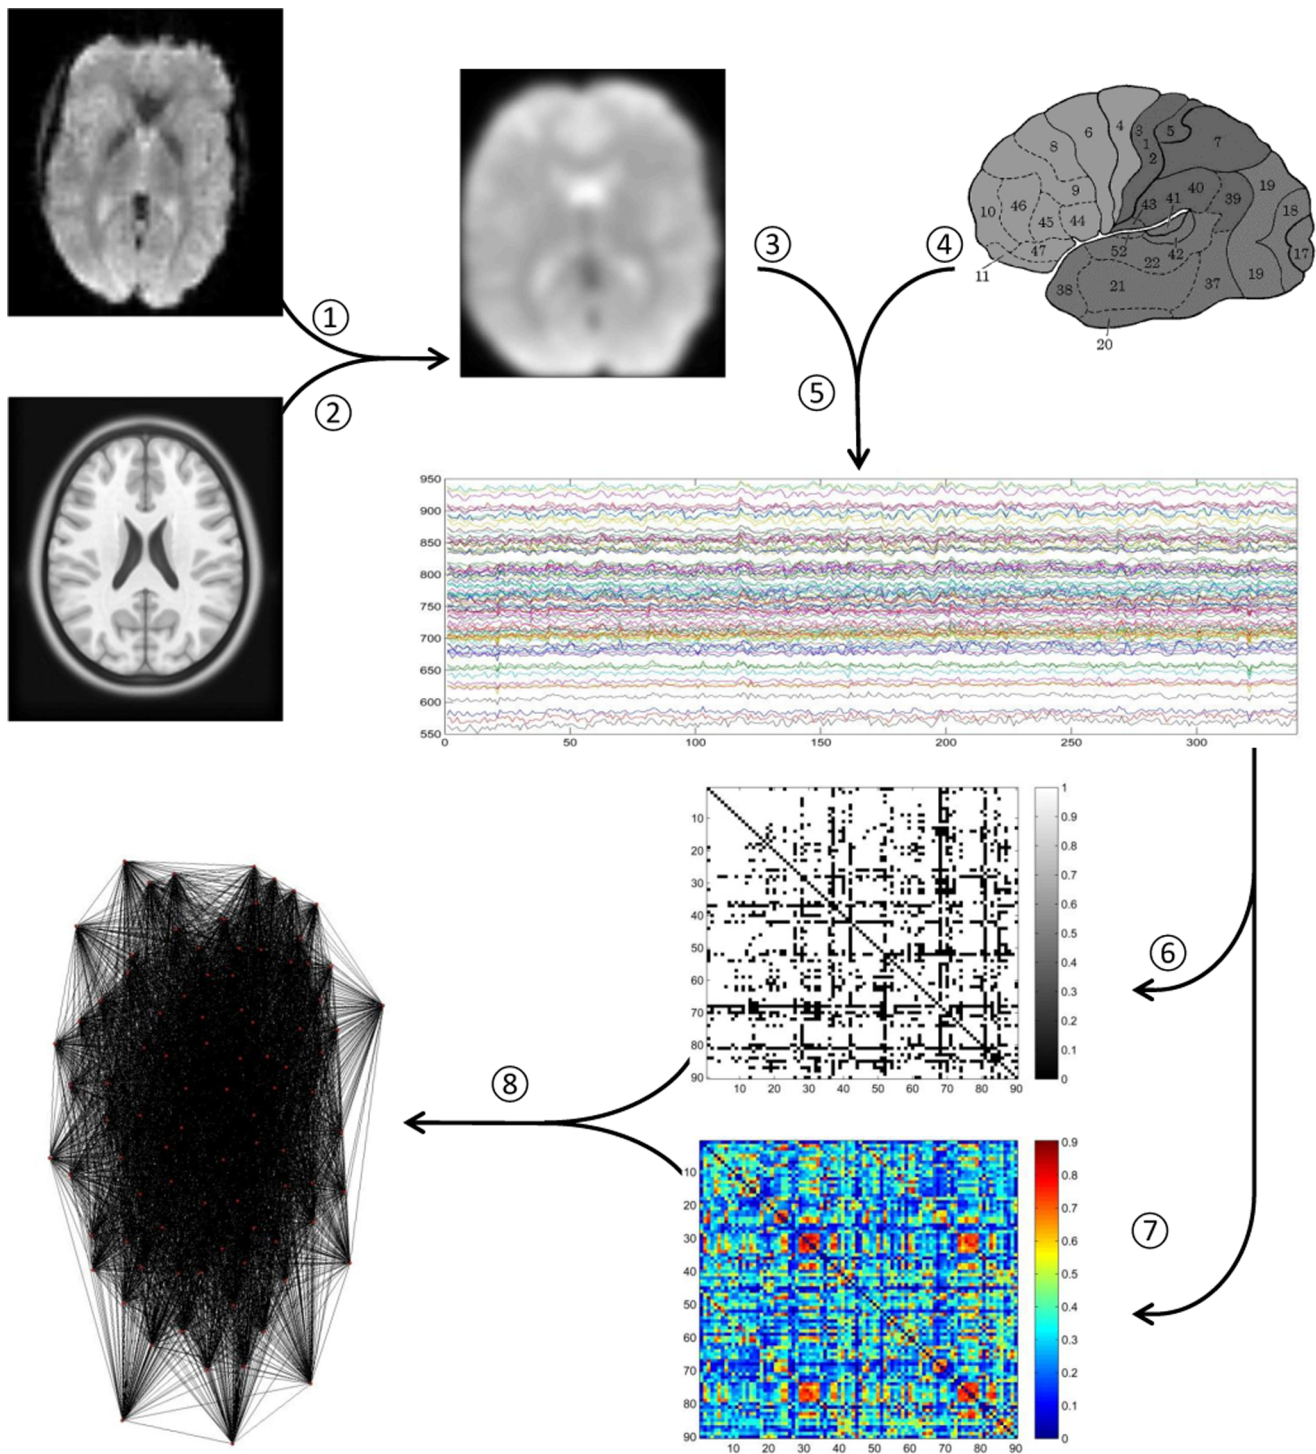

**Figure 1. A flowchart for yielding brain connectivity data and network starts with functional (1) and anatomic (2) magnetic resonance imaging scans.** In order to establish functional connectivity, a time series of brain activity in different voxels or regions can be derived. These images were later warped to the template (3) to register the location of brain regions. Once scans were registered, the brain regions were parcellated (4) according to the anatomical parcellation scheme described in [24] and 90 regional time series were extracted (5). In order to establish functional connectivity, time series of each brain region were derived and correlations between the time series of different voxels or brain regions were calculated and represented as a correlation matrix. The correlation matrix can be either directly interpreted as a binary network (6) or the weighted network (7). The weighted and binary network can be graphically represented by 3-dimensional connectivity network (8). doi:10.1371/journal.pone.0073577.g001

network properties. No obvious difference in node degree was discovered between the two groups ( $p > 0.29$ ). However, global efficiency was higher when considering swallowing ROIs and

sparsity threshold values lower than 0.35, but it did not reach statistical significance for all values ( $p < 0.07$ ). The path length  $L$  of the binary and weighted network were significantly shorter in the

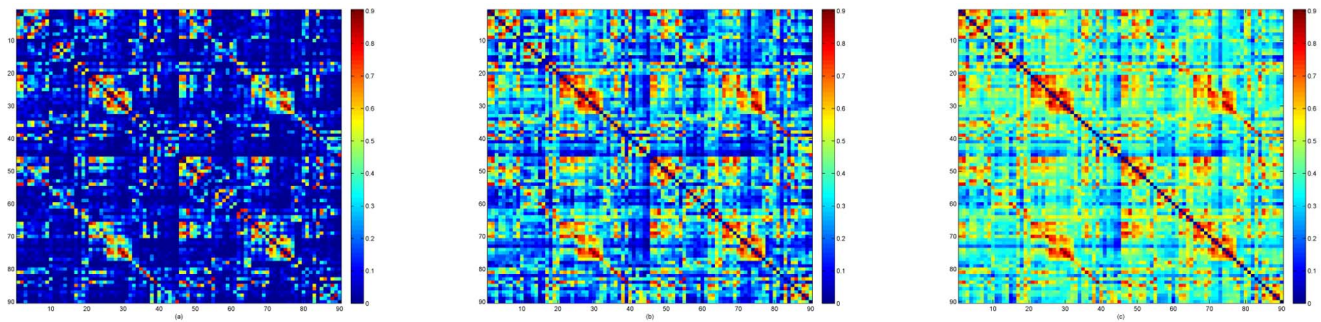

**Figure 2. The effects of maintaining different node degrees on the connectivity matrix: (a)  $K=36$ ; (b)  $K=48$ ; and (c)  $K=60$ .**  
doi:10.1371/journal.pone.0073577.g002

whole-brain metric compared to swallowing related regions ( $p < 0.05$ ) when the threshold value was within the range of 0.60 to 0.85. The local efficiency values were significantly higher when considering swallowing ROIs and threshold values within the range of 0 to 0.03 ( $p < 0.05$ ). Interestingly, we found that clustering coefficient value has slightly increased when we applied thresholds between 0.5 to 0.63. The rank-sum test showed that significant differences ( $p < 0.05$ ) had been found when comparing the whole brain and swallowing ROIs. The observed differences in the clustering coefficient were even greater in this interval in comparison to low threshold values. This has never been found in other network measurement parameters. As shown in Figure 3 (f), the hierarchy values for swallowing ROIs and the whole brain were not statistically different ( $p > 0.45$ ).

Our study demonstrated the brain functional networks are characterized by small-world attributes. First of all, the mean network clustering coefficient  $C$  calculated was 0.45 and the mean minimum path length  $L$  was 0.32. Second, the parameters  $C$  and  $L$  for a random graph with same number of nodes, links and degree distributions were also calculated, and the values were  $C_{rand} = 0.0116$  and  $L_{rand} = 0.0119$ . From the above calculation, we observed that the ratio of local clustering of connections in the brain functional network over the random network was approximately 40 ( $\frac{C}{C_{rand}} = 38.71$ ); whereas, the ratio of path length

between any two brain regions was approximately 25 ( $\frac{L}{L_{rand}} = 26.93$ ).

### Inter-Regional Functional Connectivity

Figure 4 showed the mean inter-regional functional connectivity map. It was derived by averaging across the weighted connectivity matrices of all 22 subjects. The map is a  $90 \times 90$  symmetric matrix. These 90 regions were classified into six major locations as suggested by Salvador et al. [22]. Each entry in the map represented the percentage of the connectivity strength between the corresponding pair of regions. The value of each entry ranged from 0 (deep blue color in the map) to 1 (dark red color in the map), whereas 0 means no connection at all and 1 means that two corresponding regions were firmly connected.

As we can see in Figure 4, a lot of the connections were long-distance inter-hemispheric connections between bilaterally homologous brain regions. The uniqueness and importance of bilaterally symmetric inter-hemispheric connections can be highlighted in the study of functional network. One reason being that previous multivariate-analyses based brain anatomical network studies were uni-hemispheric, it limits the connections only within a single hemisphere, which were inter-regional connections within left or right hemisphere [22].

**Table 2. Regions of brain activation associated with voluntary saliva swallowing.**

| Structure                                 | Hemisphere | Structure                                             | Hemisphere |
|-------------------------------------------|------------|-------------------------------------------------------|------------|
| Anterior cingulate and paracingulate gyri | LH/RH      | Paracentral lobule                                    | LH/RH      |
| Median cingulate and paracingulate gyri   | LH/RH      | Inferior parietal, but supramarginal and angular gyri | LH/RH      |
| Posterior cingulate gyrus                 | LH/RH      | Superior parietal gyrus                               | LH/RH      |
| Cuneus                                    | LH/RH      | Postcentral gyrus                                     | LH         |
| Middle frontal gyrus                      | LH/RH      | Precentral gyrus                                      | RH         |
| Superior frontal gyrus, dorsolateral      | LH/RH      | Precuneus                                             | LH/RH      |
| Fusiform gyrus                            | LH         | Lenticular nucleus, putamen                           | LH         |
| Hippocampus                               | LH/RH      | Supplementary motor area                              | LH/RH      |
| Insula                                    | LH/RH      | Supramarginal gyrus                                   | LH/RH      |
| Lingual gyrus                             | LH/RH      | Superior temporal gyrus                               | LH/RH      |
| Middle occipital gyrus                    | LH/RH      | Thalamus                                              | LH/RH      |
| Superior occipital gyrus                  | LH/RH      |                                                       |            |

LH: Left Hemisphere. RH: Right Hemisphere.  
doi:10.1371/journal.pone.0073577.t002

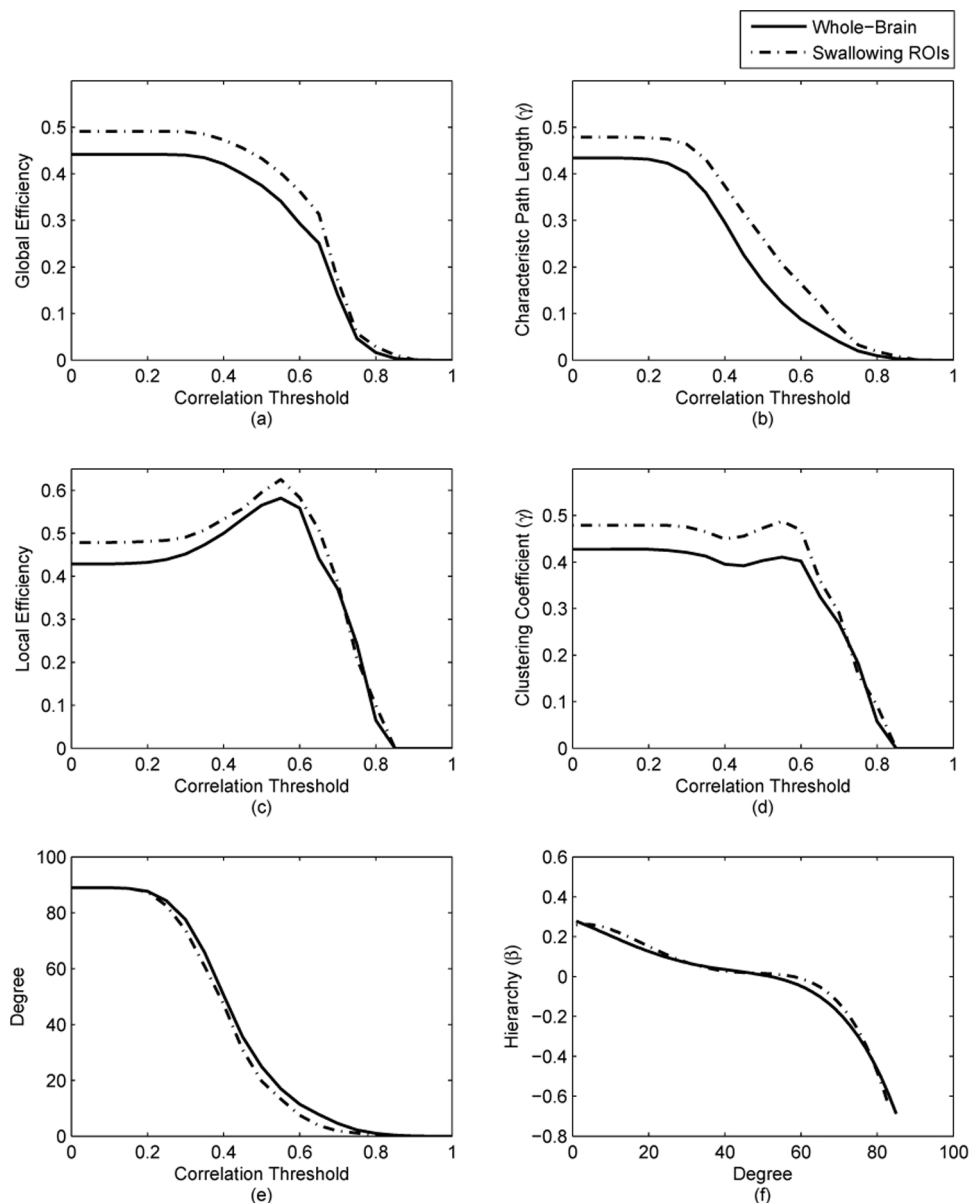

**Figure 3. Comparison of networks measures for the swallowing ROIs and the whole brain: (a) global efficiency  $E_{global}$  (b) characteristic path length  $L_p$  (c) node degree  $K$  (d) clustering coefficient  $C$  (e) mean local efficiency  $E_{local}$  (f) hierarchy  $\beta$ .**  
doi:10.1371/journal.pone.0073577.g003

## Discussion

We believe that our study is the first one to use novel graph theoretical approaches to report brain functional connectivity during voluntary saliva swallowing. By utilizing the graph theoretical approaches, we are able to study the alteration of functional connectivity at both the global scale as well as the divisional scale.

Our results highlighted that the spatial topological connectivity in swallowing related regions are significantly distinguished compared to whole-brain properties, as can be reflected on various network measurement parameters. Furthermore, our results reported the advantage of applying functional connectivity analysis rather than anatomical connectivity analysis, which is the importance of bilaterally symmetric inter-hemispheric connections. This finding from functional connectivity during swallowing

tasks has not been clearly demonstrated by previous studies using anatomical connectivity approaches.

## Network Measures

Network measures for weighted networks in this study consisted of characteristic path length ( $L$ ), local efficiency ( $E_{loc}$ ), global efficiency ( $E_{glob}$ ), clustering coefficient ( $C$ ), node degree ( $k$ ), hierarchy ( $\beta$ ), as well as the small-world attributes of the network ( $\lambda$  and  $\gamma$ ). The average value of these network properties across all the 22 subjects were demonstrated in Figure 3. Also, small-world properties, although varying in some degree, were generally found in the weighted networks of every subject in the study. The small-world attributes and hierarchical organization for whole-brain and swallowing ROIs were similar. However, global efficiency, characteristic path length, clustering coefficient and local efficiency



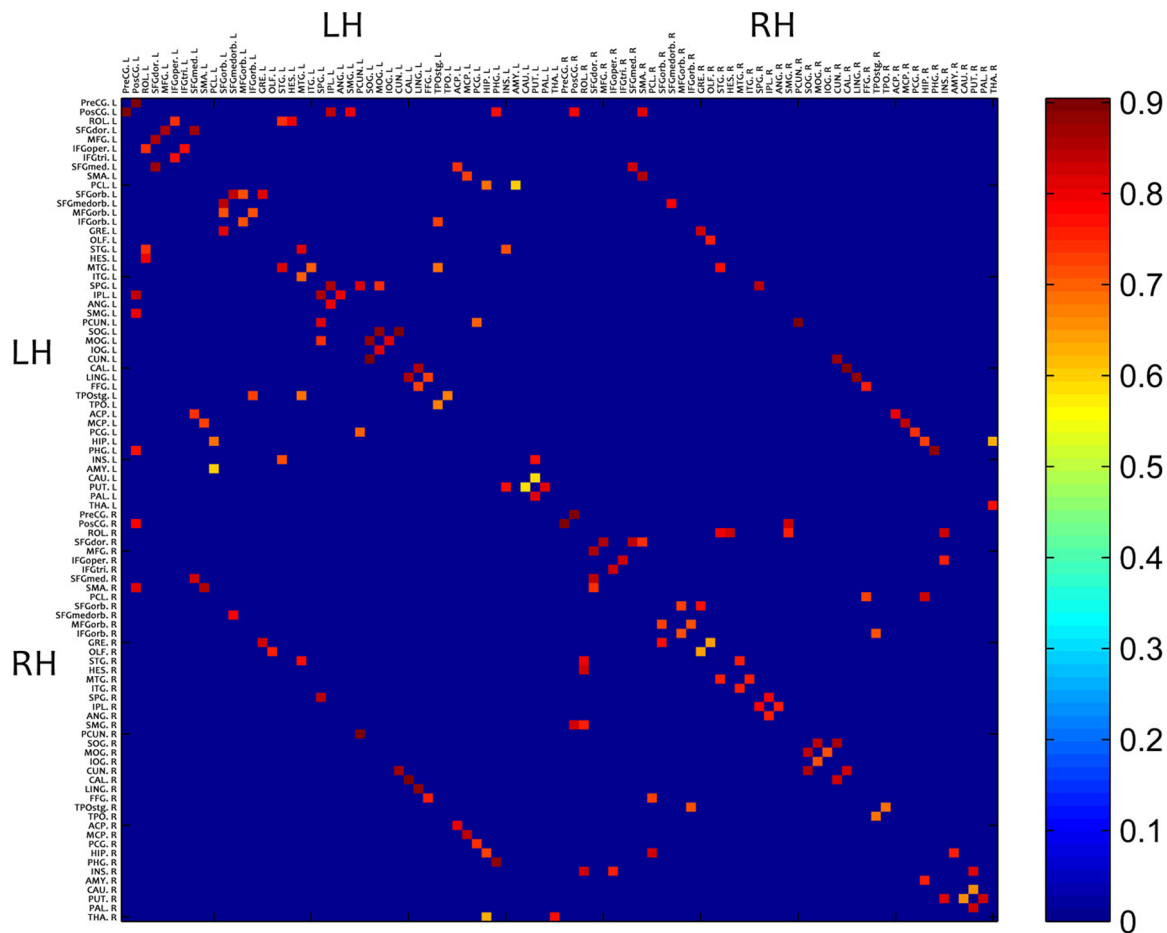

**Figure 4. Mean map of the weighted connectivity matrixes averaged across the 22 subjects.** LH: Left Hemisphere. RH: Right Hemisphere. doi:10.1371/journal.pone.0073577.g004

shows higher value within the swallowing ROIs in comparison to the whole brain.

The characteristic path length was short in both whole-brain matrices and swallowing-related regions, which indicates that the distance between distinct brain regions are short during swallowing. Although both whole-brain matrices and swallowing-related regions were showing low values, significant differences between these two groups were observed. We have observed that during swallowing the path lengths were significantly different in threshold interval from 0.60 to 0.85, which may suggest the threshold range to use when solely comparing characteristic path length for two different groups. The whole brain had a lower path length than swallowing related regions. This finding suggested that the entire brain functional network during swallowing consists of various short paths between nodes, which provides faster information transfer routes.

A clustering coefficient is defined as the proportion of the number of established connections in direct neighbors of the node to all their possible connections [5]. It can also denote the local efficiency of a network or the network's fault-tolerance [35]. Our study found that the whole-brain values were lower in comparison to the values obtained for the swallowing related regions. To be more specific, we showed that the most significant differences were observed between threshold values 0.5 and 0.63 suggesting that more information was interpreted during swallowing.

Our study also reported small global efficiency values ( $E_{glob} \sim 0.5$ ) compared to the random network ( $E_{glob,rand} \sim 1$ ); although compared to other network measurements, the difference was not as pronounced between two groups. The smaller  $E_{glob}$  values in functional brain networks compared to random networks showed that the functional brain networks are characterized by small-world properties indicated by [4]. In addition, higher global efficiency values in swallowing-related regions suggest optimal information transfer efficiency of swallowing-related regions in comparison to the whole brain.

### Small-Worldness

Our study revealed that the brain functional network associated with swallowing is a large complex network with efficient small-world properties. The small-world parameters calculated for this study were consistent with small-world attributes for brain functional networks. This further implies that distinct small-world properties are generally found in the weighted networks of every subject in the study. As we have calculated, the clustering coefficient in the brain network was generally 40 times larger than in the random network. That is to say, the brain network is about forty times as clustered when compared to a random network. Also, between any two brain regions in the network, the path length was approximately twenty times longer compared to the random network. A higher absolute clustering coefficient and shorter absolute path length in the functional brain network

suggests an optimal small-world profile [41], which benefits the local segregation and global integration within the brain functional network [19].

### Inter-Regional Functional Connectivity

The average functional brain network, shown in Figure 4, primarily consisted of strong connections between closely neighboring brain regions. This demonstrated that anatomically related regions are also likely to be functionally connected. However, functionally connected regions do not necessarily have anatomical connections. Other than intra-hemispheric connections, our data highlighted the bilaterally homologous long-range connections (e.g. PHG.L to PHG.R, SFGmed.L to SFGmed.R, SMA.L to SMA.R and etc). These inter-hemispheric connections were strong in connectivity strength ( $w_{ij} > 0.55$ ) and have not been previously reported according to their anatomical distances [29], which clearly showed the advantage of performing functional network analysis on human brain networks. The importance of bilaterally symmetric inter-hemispheric connections can be highlighted in the study of functional networks. One reason being that previous anatomical connectivity studies on which multivariate analyses have been based were uni-hemispheric; it summarizes inter-regional connections only within a single (right or left) hemisphere [22]. In addition to inter-hemispheric homologous connections, our results demonstrated few non-symmetrical bilaterally inter-hemispheric connections that also have not been reported before, such as SMA.R to PosCG.L, STG.R to HES.L, etc, as shown in Figure 4. These connections were strongly correlated ( $w_{ij} > 0.70$ ) during swallowing tasks.

Compare to previous functional network studies on various tasks, the functional networks during swallowing shows some unique connections. Wang et al. [44] performed functional connectivity analysis during memory encoding and recognition tasks. Their study showed strong functional connectivity between anatomical adjacent regions. However, the bilaterally homologous long-range connections show relatively low connectivity strength ( $w_{ij} < 0.25$ ), and the unique connections (PosCG.L to SMA.R, HIP.L to THA.R) did not exist in this study. We also referred to other functional connectivity studies [33], [41], and neither of the studies has shown bilaterally homologous long-range connections,

which further convinced us of the unique connectivity pattern during swallowing.

Also, the higher degree and stronger strength of functional connectivity in swallowing ROIs (as can be seen in Figure 4) not only demonstrated a more densely connected network during swallowing, but also indicated an increased activation of functionally related brain regions during swallowing.

Correlation between swallowing-related regions in the functional connectivity matrices suggested that this approach could be helpful in understanding the inner connections among regions during swallowing. This approach can also be used as a visualization tool of functional connectivity.

### Conclusion

In this study, we successfully reconstructed the weighted functional networks during swallowing based on fMRI recordings from 22 subjects. We utilized graph-theoretical approaches to produce a set of measures that quantified properties for swallowing-related ROIs and whole-brain metrics of a brain functional network. The main findings in the study were: (1) Swallowing regions and the whole-brain metrics showed a similar node degree distribution and optimal small-world properties. (2) Swallowing-related areas had distinct inter-regional connectivity patterns. (3) The network properties of large-scale brain connectivity differs significantly between swallowing-related areas and the whole brain. Collectively, these and other findings reported in this study provided new insights into how graph-theoretical approaches can be utilized to describe the brain functional network during swallowing and thus provided new clues for understanding the mechanism of swallowing.

### Acknowledgments

The authors are very grateful to the participants for their time.

### Author Contributions

Conceived and designed the experiments: PS ES. Performed the experiments: PS. Analyzed the data: BL ES. Contributed reagents/materials/analysis tools: BL PS ES. Wrote the paper: BL PS ES.

### References

- Mbondia E, Claus D, Bonnier C, Evrard P, Gadisseux JF, et al. (1995) Prolonged dysphagia caused by congenital pharyngeal dysfunction. *The Journal of Pediatrics* 126: 923–927.
- Sejdić E, Steele CM, Chau T (2009) Segmentation of dual-axis swallowing accelerometry signals in healthy subjects with analysis of anthropometric effects on duration of swallowing activities. *IEEE Transactions on Biomedical Engineering* 56: 1090–1097.
- Sporns O, Zwi J (2004) The small world of the cerebral cortex. *Neuroinformatics* 2: 145–162.
- Watts DJ, Strogatz SH (1998) Collective dynamics of 'small-world' networks. *Nature* 393: 440–442.
- Kaiser M (2011) A tutorial in connectome analysis: Topological and spatial features of brain networks. *NeuroImage* 57: 892–907.
- Hamdy S, Mikulis DJ, Crawley A, Xue S, Lau H, et al. (1999) Cortical activation during human volitional swallowing: an event-related fMRI study. *American Journal of Physiology – Gastrointestinal and Liver Physiology* 277: G219-1-G225-7.
- Kern MK, Jaradeh S, Arndorfer RC, Shaker R (2001) Cerebral cortical representation of receptive and volitional swallowing in humans. *American Journal of Physiology – Gastrointestinal and Liver Physiology* 280: G354-1-G360-7.
- Dziewas R, Sörös P, Ishii R, Chau W, Henningsen H, et al. (2003) Neuroimaging evidence for cortical involvement in the preparation and in the act of swallowing. *NeuroImage* 20: 135–144.
- Martin RE, MacIntosh BJ, Smith RC, Barr AM, Stevens TK, et al. (2004) Cerebral areas processing swallowing and tongue movement are overlapping but distinct: A functional magnetic resonance imaging study. *Journal of Neurophysiology* 92: 2428–2493.
- Martin RE, Barr AM, MacIntosh B, Smith RC, Stevens T, et al. (2007) Cerebral cortical processing of swallowing in older adults. *Experimental Brain Research* 176: 12–22.
- Lowell SY, Poletto CJ, Knorr-Chung BR, Reynolds RC, Simonyan K, et al. (2008) Sensory stimulation activates both motor and sensory components of the swallowing system. *NeuroImage* 42: 285–295.
- Martin RE, Goodyear BG, Gati JS, Menon RS (2001) Cerebral cortical representation of automatic and volitional swallowing in humans. *Journal of Neurophysiology* 85: 938–950.
- Mosier KM, Liu WC, Maldjian JA, Shah R, Modi B (1999) Lateralization of cortical function in swallowing: A functional MR imaging study. *American Journal of Neuroradiology* 20: 1520–1526.
- Zald DH, Pardo JV (1999) The functional neuroanatomy of voluntary swallowing. *Annals of Neurology* 46: 281–286.
- Sörös P, Inamoto Y, Martin RE (2009) Functional brain imaging of swallowing: an activation likelihood estimation meta-analysis. *Human Brain Mapping* 30: 2426–39.
- Sörös P, Al-Otaibi F, Wong SWH, Shoemaker JK, Mirsattari SM, et al. (2011) Stuttered swallowing: Electric stimulation of the right insula interferes with water swallowing: a case report. *BMC Neurology* 11: 20.
- Friston KJ, Ashburner JT, Kiebel SJ, Nichols TE, Penny WD, editors (2006) *Statistical Parametric Mapping: The Analysis of Functional Brain Images*. Jordan Hill, GBR: Academic Press.
- Friston KJ, Frith CD, Frackowiak RSJ, Turner R (1995) Characterizing dynamic brain responses with fMRI: A multivariate approach. *NeuroImage* 2: 166–172.
- Liu Y, Liang M, Zhou Y, He Y, Hao Y, et al. (2008) Disrupted small-world networks in schizophrenia. *Brain* 131: 945–961.

20. Rubinov M, Sporns O (2010) Complex network measures of brain connectivity: Uses and interpretations. *NeuroImage* 52: 1059–1069.
21. Achard S, Salvador R, Whitcher B, Suckling J, Bullmore E (2006) A resilient, low-frequency, small-world human brain functional network with highly connected association cortical hubs. *The Journal of Neuroscience* 26: 63–72.
22. Salvador R, Suckling J, Coleman MR, Pickard JD, Menon D, et al. (2005) Neurophysiological architecture of functional magnetic resonance images of human brain. *Cerebral Cortex* 15: 1332–1342.
23. Zeng LL, Shen H, Liu L, Wang L, Li B, et al. (2012) Identifying major depression using whole-brain functional connectivity: a multivariate pattern analysis. *Brain* 135: 1498–1507.
24. Tzourio-Mazoyer N, Landeau B, Papathanassiou D, Crivello F, Etard O, et al. (2002) Automated anatomical labeling of activations in SPM using a macroscopic anatomical parcellation of the MNI MRI single-subject brain. *NeuroImage* 15: 273–289.
25. Brett M, Anton JL, Valabregue R, Poline JB (2002) Region of interest analysis using an SPM toolbox. In: 8th International Conference on Functional Mapping of the Human Brain. Sendai, Japan.
26. Bullmore E, Sporns O (2009) Complex brain networks: graph theoretical analysis of structural and functional systems. *Nature Reviews Neuroscience* 10: 186–198.
27. Barabasi AL, Albert R, Jeong H (2000) Scale-free characteristics of random networks: the topology of the world-wide web. *Physica A: Statistical Mechanics and its Applications* 281: 69–77.
28. Sporns O, Chialvo DR, Kaiser M, Hilgetag CC (2004) Organization, development and function of complex brain networks. *Trends in Cognitive Sciences* 8: 418–425.
29. Li Y, Liu Y, Li J, Qin W, Li K, et al. (2009) Brain anatomical network and intelligence. *PLoS Computational Biology* 5: e1000395-1-17.
30. Boccaletti S, Latora V, Moreno Y, Chavez M, Hwang DU (2006) Complex networks: Structure and dynamics. *Physics Reports* 424: 175–308.
31. Latora V, Marchiori M (2001) Efficient behavior of small-world networks. *Physical Review Letters* 87: 198701-1-4.
32. Achard S, Bullmore E (2007) Efficiency and cost of economical brain functional networks. *PLoS Computational Biology* 3: e17-0174-0183.
33. Supekar K, Musen M, Menon V (2009) Development of large-scale functional brain networks in children. *PLoS Biology* 7: e1000157-1-15.
34. Newman MEJ (2003) The structure and function of complex networks. *SIAM Review* 45: 167–256.
35. Strogatz SH (2001) Exploring complex networks. *Nature* 410: 268–276.
36. Gong G, He Y, Concha L, Lebel C, Gross DW, et al. (2009) Mapping anatomical connectivity patterns of human cerebral cortex using in vivo diffusion tensor imaging tractography. *Cerebral Cortex* 19: 524–536.
37. Bassett DS, Bullmore E, Verchinski BA, Mattay VS, Weinberger DR, et al. (2008) Hierarchical organization of human cortical networks in health and schizophrenia. *The Journal of Neuroscience* 28: 9239–9248.
38. Ravasz E, Barabási AL (2003) Hierarchical organization in complex networks. *Physical Review E* 67: 026112-1-7.
39. Honey CJ, Sporns O, Cammoun L, Gigandet X, Thiran JP, et al. (2009) Predicting human resting-state functional connectivity from structural connectivity. *Proceedings of the National Academy of Sciences* 106: 2035–2040.
40. Whittaker J (1992) Graphical models in applied multivariate statistics. *Journal of Classification* 9: 159–160.
41. Supekar K, Menon V, Rubin D, Musen M, Greicius MD (2008) Network analysis of intrinsic functional brain connectivity in Alzheimer's disease. *PLoS Computational Biology* 4: e1000100-1-11.
42. Liao W, Zhang Z, Pan Z, Mantini D, Ding J, et al. (2010) Altered functional connectivity and small-world in mesial temporal lobe epilepsy. *PLoS one* 5: e8525.
43. Mann HB, Whitney DR (1947) On a test of whether one of two random variables is stochastically larger than the other. *Analysis of Mathematical Statistics* 18: 50–60.
44. Wang L, Li Y, Metzack P, He Y, Woodward TS (2010) Age-related changes in topological patterns of large-scale brain functional networks during memory encoding and recognition. *NeuroImage* 50: 862–872.
